# Supplementary material for: Synthesis and Characterization of Gel Polymer Electrolyte Based on Epoxy Group via Cationic Ring-Open Polymerization for Lithium-Ion Battery
Source: MDPI journal article supplement (doi:10.3390/membranes12040439), 2022-04-18
Supplement: s1 [file s1]

# Supporting information for Synthesis and Characterization of Gel Polymer Electrolyte Based on Epoxy Group via Cationic Ring- Open Polymerization for Lithium-Ion Battery

**Table S1.** Comparison of properties of polymer electrolyte reported based on ring-opening polymerization

| Components        | Salt/Pasticizer/Solvent   | $\sigma(\text{mS/cm})^a$ | Stability vs (Li <sup>+</sup> /Li) (V) and cathode | Ref.      |
|-------------------|---------------------------|--------------------------|----------------------------------------------------|-----------|
| PEO               | LiTFSI/no/ACN             | 0.0004                   | 4.8                                                | 1         |
| DGEPEG, PEGDA     | LiTFSI/no/no              | 0.053                    | 4.7, LFP                                           | 2         |
| POSS, P(EO-co-PO) | LiTFSI/ no/THF            | 0.11                     | 5.4, LFP                                           | 3         |
| GLYMO, EDGE       | LiTFSI/no/Ethanol         | 0.026                    | 4.9, LTO                                           | 4         |
| GLYMO, DGEPEG     | LiClO <sub>4</sub> /no/no | 0.12                     | N/A                                                | 5         |
| BDE, ED600        | LiTFSI                    | 0.5 <sup>b</sup>         | 4.51, LFP                                          | 6         |
| PNGDE-1.5         | LiFSI/no/no               | 1.57                     | 4.0, LFP                                           | This work |

1) <sup>a</sup> at 25 °C unless notes

2) <sup>b</sup> at 45 °C

2) Acetonitrile (ACN), tetrahydrofuran (THF), lithium bis(trimethanesulfonyl)imide (LiTFSI), LiFePO<sub>4</sub> (LFP), Ni<sub>1/3</sub>Mn<sub>1/3</sub>Co<sub>1/3</sub>O<sub>2</sub> -NMC, Li<sub>4</sub>Ti<sub>5</sub>O<sub>12</sub> (LTO), Poly (ethylene oxide) (PEO), Diglycidylether of polyethylene glycol (DGEPEG), Poly (ethylene glycol) diacrylate (PEGDA), Polyhedral oligomeric silsequioxane (POSS), Poly(ethylene-co-propylene oxide) (P(EO-co-PO)), (3-glycidyoxypropyl) trimethoxy silane (GLYMO), Ethyl glycol diglycidyl ether (EDGE), Bisphenol A diglycidyl ether (BDE), O,O-bis(2-aminopropyl) polypropylene glycol-*block*-polypropylene glycol (ED600)

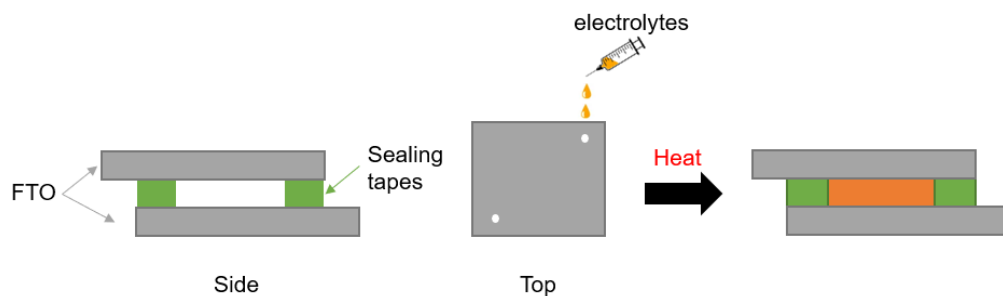

**Figure S1.** Fabrication of asymmetry dummy cell for measuring ionic conductivity.

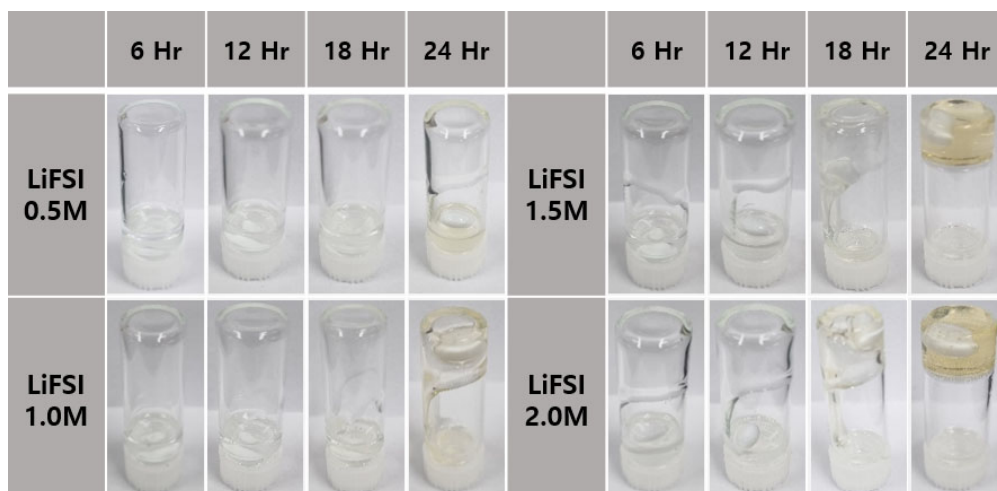

**Figure S2.** Photographing of various concentrations LiFSI with PNGDE up to 24 h.

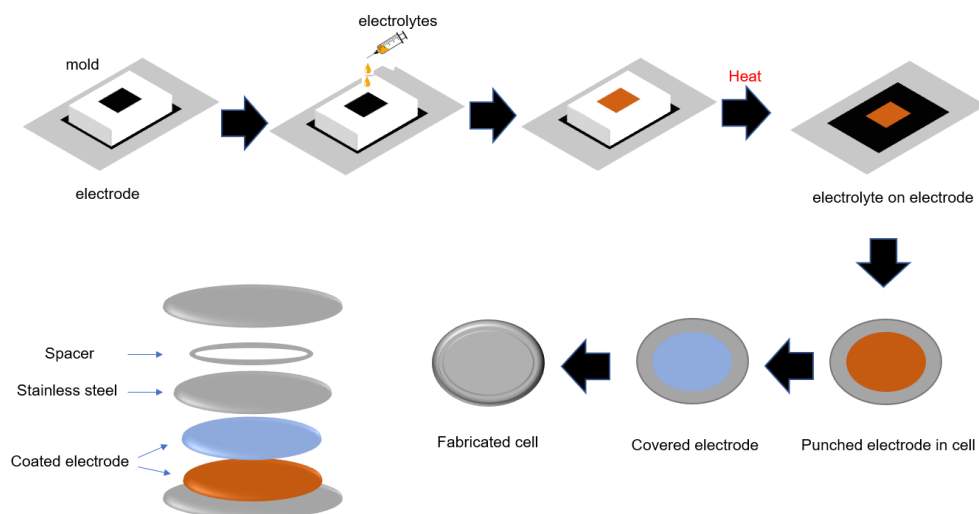

**Figure S3.** Fabrication and in situ process of coin cell without separator.

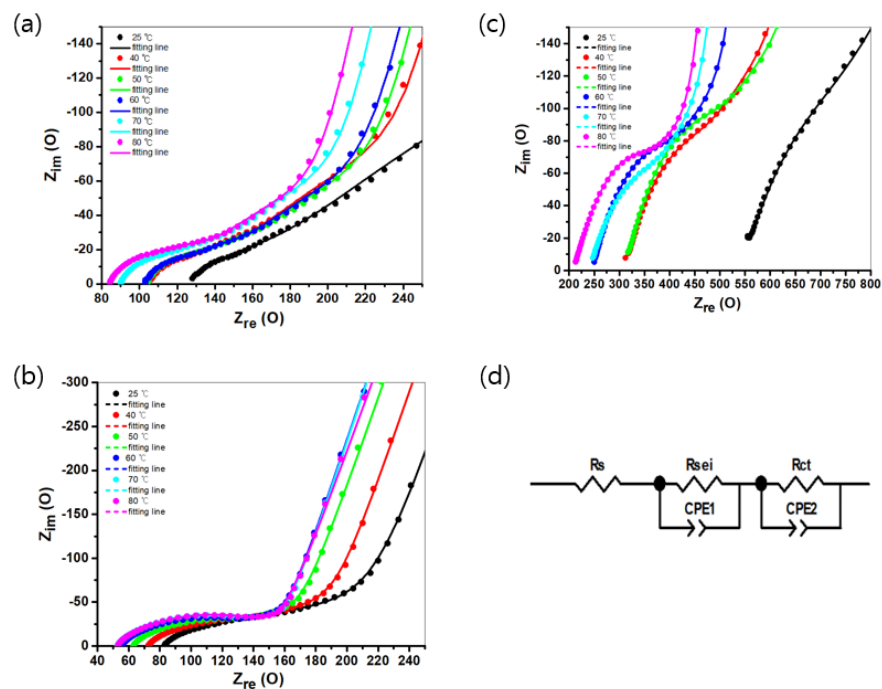

**Figure S4.** Nyquist curves of PNGDE1 (a), PNGDE1.5 with fitting plots (b) and PNGDE2 (c); equivalent circuit (d).

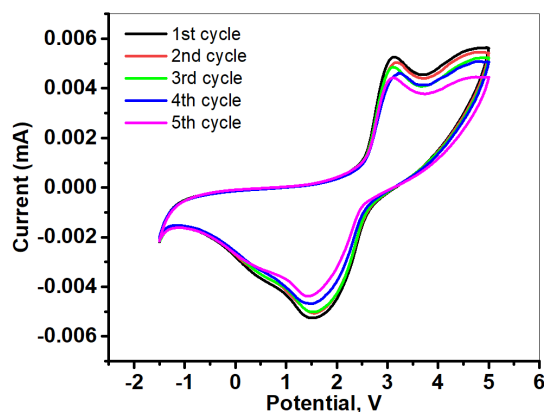

**Figure S5.** Cyclic voltammetry profiles of PNGDE 1.5 over potential range from -1.5 to 5.0 V, scanning rate of 1 mV/s at room temperature.

## References

1. Cheng, H.; Zhu, C.; Huang, B.; Lu, M.; Yang, Y. Synthesis and electrochemical characterization of PEO-based polymer electrolytes with room temperature ionic liquids. *Electrochim. Acta* **2007**, *52*, 5789–5794.

- doi: 10.1016/j.electacta.2007.02.062.
2. Duan, H.; Yin, Y.X.; Zeng, X.X.; Li, J.Y.; Shi, J.L.; Shi, Y.; Wen, R.; Guo, Y.G.; Wan, L.J. In situ plasticized polymer electrolyte with double-network for flexible solid-state lithium-metal batteries. *Energy Storage Mater.* **2018**, *10*, 85–91. doi: 10.1016/j.ensm.2017.06.017.
  3. Hsu, S.T.; Tran, B.T.; Subramani, R.; Nguyen, H.T.T.; Rajamani, A.; Lee, M.Y.; Hou, S.S.; Lee, Y.L.; Teng, H. Free-standing polymer electrolyte for all-solid-state lithium batteries operated at room temperature. *J. Power Sources* **2020**, *449*, 227518. doi: 10.1016/j.jpowsour.2019.227518.
  4. Vélez, J.F.; Aparicio, M.; Mosa, J. Covalent silica-PEO-LiTFSI hybrid solid electrolytes via sol-gel for Li-ion battery applications. *Electrochim. Acta* **2016**, *213*, 831–841. doi: 10.1016/j.electacta.2016.07.146.
  5. Popall, M.; Andrei, M.; Kappel, J.; Kron, J.; Olma, K.; Olsowski, B. ORMOCERs as inorganic-organic electrolytes for new solid state lithium batteries and supercapacitors. *Electrochim. Acta* **1998**, *43*, 1155–1161. doi: 10.1016/S0013-4686(97)10014-7.
  6. Tian, G.; Zhao Z.; Zinkevich, T.; Elies, K.; Scheiba, F.; Ehrenberg, H. A crosslinked Polyethyleneglycol Solid Electrolyte Dissolving Lithium Bis(trifluoromethylsulfonyl)imide for Rechargeable Lithium Batteries. *ChemSuschem* **2019**, *12*, 4708–4718. doi: 10.1002/cssc.201901587.
